# Supplementary material for: Racial Differences in Pain Assessment and False Beliefs About Race in AI Models
Source: PubMed Central journal article supplement (PMC11459244; doi:10.1001/jamanetworkopen.2024.37977), 2024-10-07
Supplement: jamanetwopen-e2437977-s002.pdf [file jamanetwopen-e2437977-s002.pdf]

## Data Sharing Statement

Deb. Racial Differences in Pain Assessment and False Beliefs About Race in AI Models. *JAMA Netw Open*. Published October 07, 2024. doi:10.1001/jamanetworkopen.2024.37977

### Data

**Data available:** The data for the study is publicly available from <https://osf.io/crxwa/>
